# Supplementary material for: Carboxymethyl Cellulose-Grafted Mesoporous Silica Hybrid Nanogels for Enhanced Cellular Uptake and Release of Curcumin
Source: MDPI journal article supplement (doi:10.3390/gels3010008), 2017-02-22
Supplement: s1 [file s1]

## **Supporting Information**

# Carboxymethyl cellulose Grafted Mesoporous Silica hybrid Nanogels for enhanced Cellular uptake and release of Curcumin

Neha Tiwari<sup>1,3</sup>, Laxman Nawale<sup>2</sup>, Dhiman Sarkar<sup>2,3</sup> and Manohar V. Badiger<sup>1,3\*</sup>

<sup>1</sup> Polymer Science and Engineering Division, CSIR- National Chemical Laboratory, Pune- 411008

<sup>2</sup> Combichem Bioresource Centre, Organic Chemistry Division, CSIR-National Chemical Laboratory, Pune- 411008

<sup>3</sup> Academy of Scientific & Innovative Research, CSIR-NCL Campus, Pune-411008

E-mail: [mv.badiger@ncl.res.in](mailto:mv.badiger@ncl.res.in); Tel: +91-20-25902187; Fax: +91-20-2590-2612

### **1. SEM of MSNs**

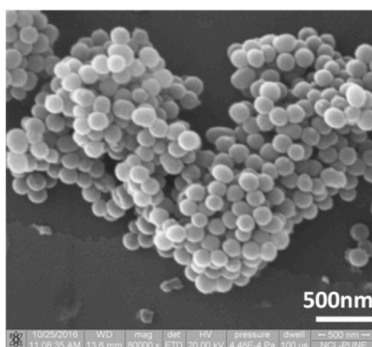

**Fig.1S.** SEM image of as synthesized MSNs

### **2. Multimodal distribution of as synthesized and Functionalized MSNs**

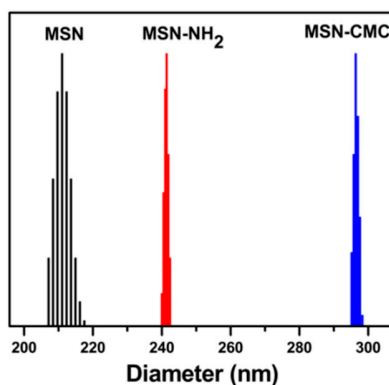

**Fig.2S.** DLS of MSN, MSN-NH<sub>2</sub> and MSN-CMC

### 3. Pore diameter of MSN

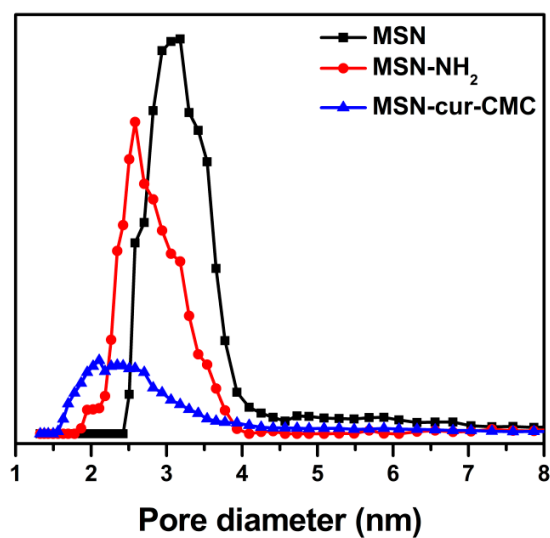

**Fig.3S.** Pore diameter of MSN, MSN-NH<sub>2</sub> and MSN-cur-CMC using BJH method from N<sub>2</sub>-adsorption desorption studies

### 4. Cellular uptake of MSN-NH<sub>2</sub> and MSN-CMC

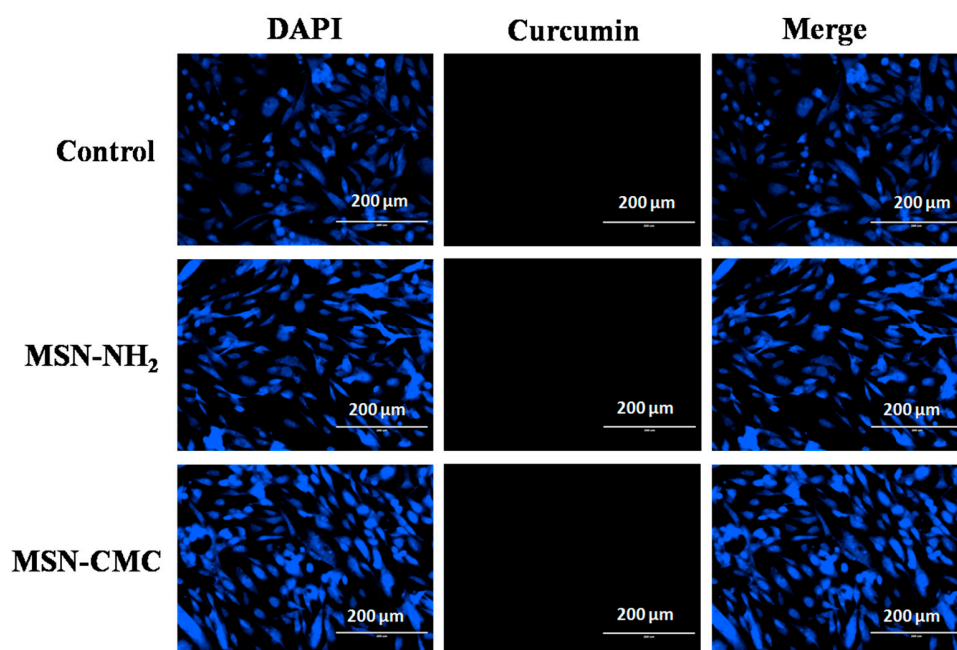

**Fig.4S.** Intracellular uptake of MSN-NH<sub>2</sub> and MSN-CMC using fluorescence microscopy. Images of MDA-MB-231 incubated with 200μg/ml of MSN-NH<sub>2</sub> and MSN- CMC. Control refers to the non treated MDA-MB-231 cells. Blue fluorescence is due to nuclei staining of cell with DAPI

## 5. Apoptosis of MSN-NH<sub>2</sub> and MSN-CMC

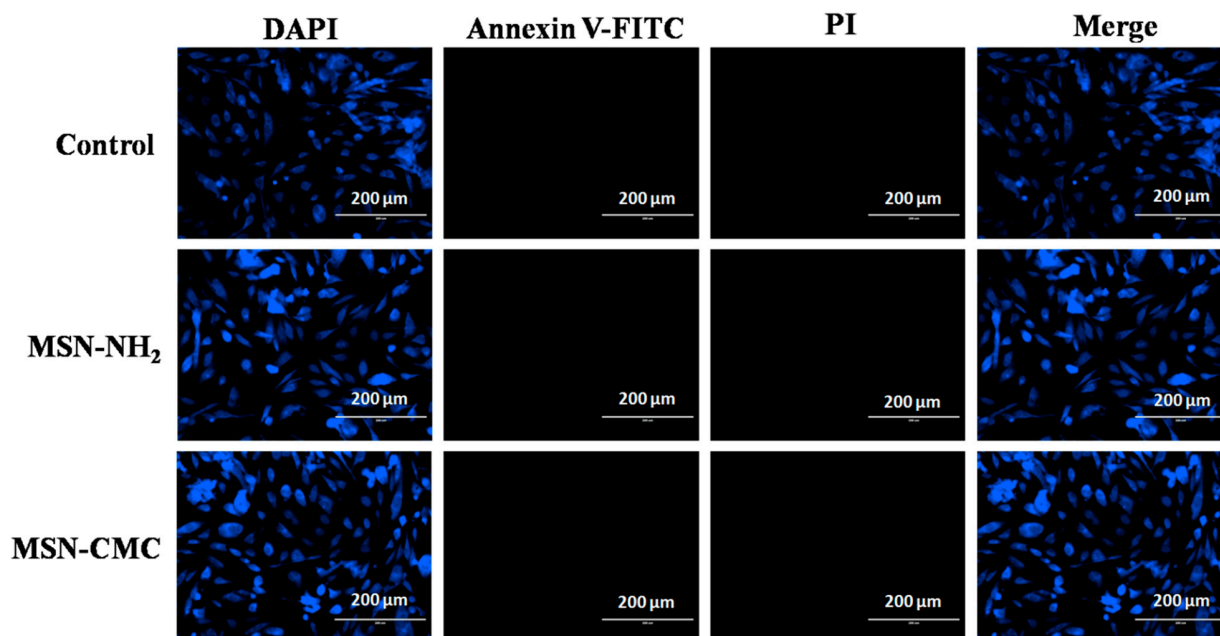

**Fig.5S.** Apoptosis of MDA-MB-231 cells using fluorescence microscopy. Images are at a magnification of 200 $\mu$ m of MDA-MB-231 incubated with 200 $\mu$ g/ml of MSN-NH<sub>2</sub> and MSN- CMC. Images of MDA-MB-231 incubated with 200 $\mu$ g/ml of MSN-NH<sub>2</sub> and MSN- CMC. Control refers to the non treated MDA-MB-231 cells. Blue fluorescence is due to nuclei staining of cell with DAPI

6. Fluorescence due to curcumin from MSN-cur-NH<sub>2</sub> and MSN-cur-CMC after 48hrs

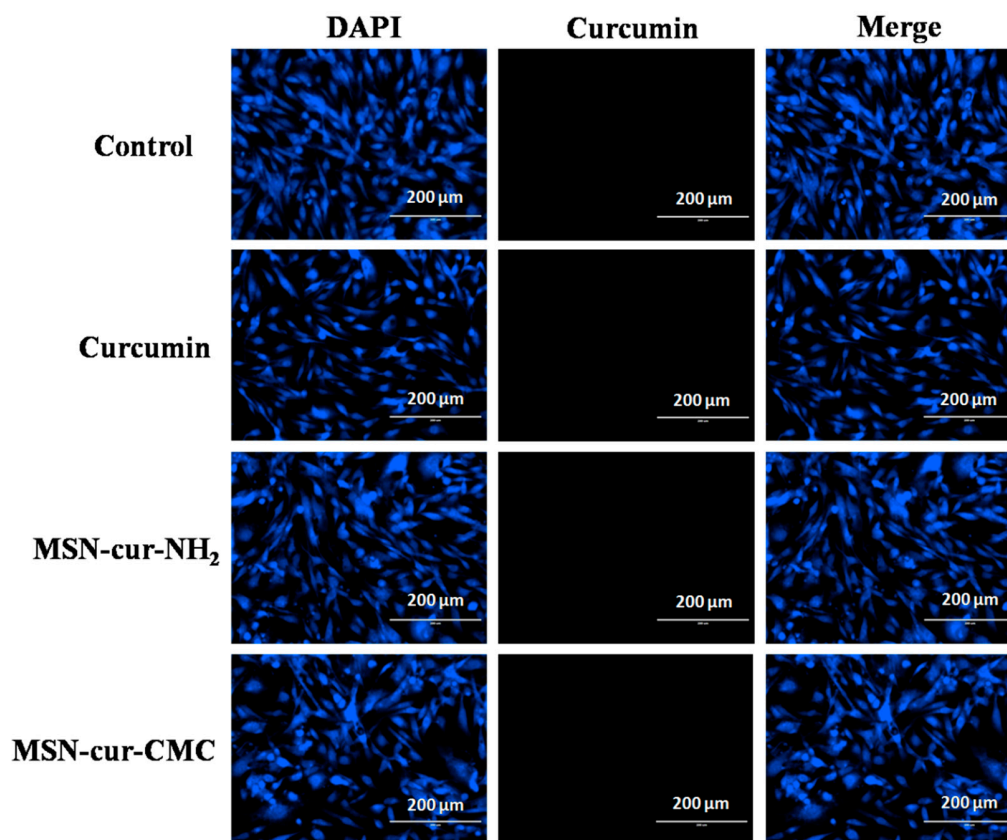

**Fig.6S.** Intracellular uptake of -NH<sub>2</sub> and -CMC functionalized MSNs using fluorescence microscopy after 48hrs. Images of MDA-MB-231 incubated with 16μg/ml of free curcumin, MSN-cur-NH<sub>2</sub> (GI<sub>50</sub>=7μg/ml) and MSN-cur-CMC (GI<sub>50</sub>=1.5μg/ml). Control refers to the non treated MDA-MB-231 cells. Blue fluorescence is due to nuclei staining of cell with DAPI and green due to fluorescence of curcumin release inside the cells.
